# Supplementary material for: Musculoskeletal Disorders in Primary School Teachers
Source: MDPI journal article supplement (doi:10.3390/su152316222), 2023-11-23
Supplement: s1 [file s1]

| Nordic Kuorinka Quiz |                                                            |       |      |      |
|----------------------|------------------------------------------------------------|-------|------|------|
|                      | Question                                                   |       |      |      |
|                      | 1. Have you had discomfort in...????                       |       |      |      |
| Neck                 | Yes                                                        |       | No   |      |
| Shoulder             | Left                                                       | Right | Both | None |
| Dorsum or lumbar     | Left                                                       | Right | Both | None |
| Elbow or forearm     | Left                                                       | Right | Both | None |
| Wrist or hand        | Left                                                       | Right | Both | None |
|                      | 2. How long has it been?                                   |       |      |      |
| Neck                 | Yes                                                        |       | No   |      |
| Shoulder             | Left                                                       | Right | Both | None |
| Dorsum or lumbar     | Left                                                       | Right | Both | None |
| Elbow or forearm     | Left                                                       | Right | Both | None |
| Wrist or hand        | Left                                                       | Right | Both | None |
|                      | 3. Have you needed to change jobs?                         |       |      |      |
| Neck                 | Yes                                                        |       | No   |      |
| Shoulder             | Left                                                       | Right | Both | None |
| Dorsum or lumbar     | Left                                                       | Right | Both | None |
| Elbow or forearm     | Left                                                       | Right | Both | None |
| Wrist or hand        | Left                                                       | Right | Both | None |
|                      | 4. Have you had any discomfort in the last 12 months?      |       |      |      |
| Neck                 | Yes                                                        |       | No   |      |
| Shoulder             | Left                                                       | Right | Both | None |
| Dorsum or lumbar     | Left                                                       | Right | Both | None |
| Elbow or forearm     | Left                                                       | Right | Both | None |
| Wrist or hand        | Left                                                       | Right | Both | None |
|                      | 5. How long have you had discomfort in the last 12 months? |       |      |      |
| Neck                 | Yes                                                        |       | No   |      |
| Shoulder             | Left                                                       | Right | Both | None |
| Dorsum or lumbar     | Left                                                       | Right | Both | None |
| Elbow or forearm     | Left                                                       | Right | Both | None |
| Wrist or hand        | Left                                                       | Right | Both | None |

|                  |                                                                                                         |       |      |      |   |
|------------------|---------------------------------------------------------------------------------------------------------|-------|------|------|---|
|                  | <b>6. How long does each episode?</b>                                                                   |       |      |      |   |
| Neck             | Yes                                                                                                     |       |      | No   |   |
| Shoulder         | Left                                                                                                    | Right | Both | None |   |
| Dorsum or lumbar | Left                                                                                                    | Right | Both | None |   |
| Elbow or forearm | Left                                                                                                    | Right | Both | None |   |
| Wrist or hand    | Left                                                                                                    | Right | Both | None |   |
|                  | <b>7. How much time have these discomforts prevented you from doing your job in the last 12 months?</b> |       |      |      |   |
| Neck             | Yes                                                                                                     |       |      | No   |   |
| Shoulder         | Left                                                                                                    | Right | Both | None |   |
| Dorsum or lumbar | Left                                                                                                    | Right | Both | None |   |
| Elbow or forearm | Left                                                                                                    | Right | Both | None |   |
| Wrist or hand    | Left                                                                                                    | Right | Both | None |   |
|                  | <b>8. Have you received treatment for these complaints in the last 12 months?</b>                       |       |      |      |   |
| Neck             | Yes                                                                                                     |       |      | No   |   |
| Shoulder         | Left                                                                                                    | Right | Both | None |   |
| Dorsum or lumbar | Left                                                                                                    | Right | Both | None |   |
| Elbow or forearm | Left                                                                                                    | Right | Both | None |   |
| Wrist or hand    | Left                                                                                                    | Right | Both | None |   |
|                  | <b>9. Have you had any discomfort in the last 7 days?</b>                                               |       |      |      |   |
| Neck             | Yes                                                                                                     |       |      | No   |   |
| Shoulder         | Left                                                                                                    | Right | Both | None |   |
| Dorsum or lumbar | Left                                                                                                    | Right | Both | None |   |
| Elbow or forearm | Left                                                                                                    | Right | Both | None |   |
| Wrist or hand    | Left                                                                                                    | Right | Both | None |   |
|                  | <b>10. Rate your discomfort between 0 (no discomfort) and 5 (very strong discomfort)</b>                |       |      |      |   |
| Neck             | 1                                                                                                       | 2     | 3    | 4    | 5 |
| Shoulder         | 1                                                                                                       | 2     | 3    | 4    | 5 |
| Dorsum or lumbar | 1                                                                                                       | 2     | 3    | 4    | 5 |
| Elbow or forearm | 1                                                                                                       | 2     | 3    | 4    | 5 |
| Wrist or hand    | 1                                                                                                       | 2     | 3    | 4    | 5 |
|                  | <b>11. To what do you attribute this inconvenience?</b>                                                 |       |      |      |   |

|                  |  |
|------------------|--|
| Neck             |  |
| Shoulder         |  |
| Dorsum or lumbar |  |
| Elbow or forearm |  |
| Wrist or hand    |  |
