# Supplementary material for: Musculoskeletal Disorders in Primary School Teachers
Source: MDPI journal article supplement (doi:10.3390/su152316222), 2023-11-23
Supplement: s1 [file s1]

Archive with 1 entries (1 files):
- sustainability-2674822-supplementary.pdf
